# Supplementary material
Source: publisher figshare collection journal article supplement (https://tandf.figshare.com/articles/dataset/_/3804360)
Supplement: Supplementary file 1 [file 1]

**Table S2** The proportion of figs occupied by *O. galili* and its densities within occupied figs in Yunnan (collections 1–6, 19, 16) and Sicily (collections 21–29). *Sycophila* spp. are parasitoids of *O. galili*. Palermo (Sicily) is located at 38° 07' N.

| Crops | Frequency occupied | N (figs) | Female wasps of <i>O. galili</i> |       | Male wasps of <i>O. galili</i> |       | Total wasps of <i>O. galili</i> |        | <i>Sycophila</i> spp. |
|-------|--------------------|----------|----------------------------------|-------|--------------------------------|-------|---------------------------------|--------|-----------------------|
|       |                    |          | Average ( mean±SE )              | Range | Average ( mean±SE )            | Range | Average ( mean±SE )             | Range  |                       |
| 1     | 0.97               | 30       | 12.63 ± 1.24                     | 1-34  | 3.47 ± 0.64                    | 0-17  | 16.10 ± 1.23                    | 7–39   | 0                     |
| 2     | 0.97               | 29       | 18.34 ± 1.47                     | 8-35  | 5.00 ± 0.92                    | 1-22  | 23.17 ± 1.63                    | 9–40   | 0                     |
| 3     | 1.00               | 39       | 22.59 ± 1.88                     | 5-49  | 6.10 ± 0.88                    | 1-23  | 28.69 ± 1.93                    | 13–59  | 0                     |
| 4     | 1.00               | 37       | 18.19 ± 1.71                     | 1-47  | 4.11 ± 0.75                    | 1-5   | 22.30 ± 1.71                    | 6–53   | 0                     |
| 5     | 0.90               | 27       | 18.11 ± 2.28                     | 3-36  | 10.41 ± 1.61                   | 2-33  | 28.52 ± 2.64                    | 2–56   | 1.07 ± 0.45           |
| 6     | 1.00               | 40       | 49.70 ± 2.49                     | 20-79 | 39.00 ± 2.10                   | 3-63  | 88.70 ± 3.79                    | 27–126 | 1.06 ± 0.24           |
| 19    | 0.59               | 19       | 3.68 ± 0.78                      | 1-17  | 1.79 ± 0.30                    | 0-5   | 5.47 ± 0.10                     | 1–16   | 0                     |
| 16    | 0.07               | 2        | 1                                | 0     | 1                              | 0     | 1                               | 1–1    | 0                     |
| 21    | 0.40               | 4        | 16.75 ± 9.36                     | 2-41  | 3.75 ± 1.11                    | 1-6   | 20.50 ± 9.72                    | 3–46   | 0                     |
| 22    | 1.00               | 10       | 17.10 ± 4.23                     | 2-47  | 12.60 ± 1.46                   | 6-21  | 29.70 ± 4.71                    | 15–64  | 0                     |
| 23    | 0.20               | 2        | 14.00 ± 11.00                    | 3-25  | 1.50 ± 1.50                    | 0-3   | 15.50 ± 12.50                   | 3–28   | 0                     |
| 24    | 0.20               | 2        | 16.50 ± 14.50                    | 2-31  | 5.00 ± 5.00                    | 0-10  | 21.50 ± 19.50                   | 2–41   | 0                     |
| 25    | 0.90               | 9        | 26.67 ± 4.35                     | 2-45  | 13.11 ± 3.16                   | 2-28  | 39.78 ± 6.65                    | 4–66   | 0                     |
| 26    | 1.00               | 10       | 13.10 ± 1.64                     | 6-21  | 22.90 ± 3.46                   | 15-50 | 36.00 ± 4.62                    | 22–70  | 0                     |
| 27    | 1.00               | 10       | 23.60 ± 2.00                     | 10-30 | 30.80 ± 2.42                   | 18-45 | 54.40 ± 3.82                    | 32–67  | 0                     |
| 28    | 0.60               | 6        | 6.70 ± 4.38                      | 0-13  | 1.50 ± 0.73                    | 1-9   | 8.20 ± 4.88                     | 2–17   | 0                     |
| 29    | 0.90               | 9        | 17.10 ± 4.23                     | 0-18  | 12.60 ± 1.46                   | 4-21  | 29.70 ± 4.71                    | 9–38   | 0                     |
