# Supplementary material
Source: publisher figshare collection journal article supplement (https://tandf.figshare.com/articles/dataset/_/3804360)
Supplement: Supplementary file 2 [file 1]

**Table S1** Locations (North-South) and contents of *F. microcarpa* figs in Yunnan. Each collection comprised figs from a single tree, collected on the same date. Kunming is located at N 24° 53', Jinghong at N 22° 00'.

| Crops | Date      | Site          | Altitude<br>( m ) | Habitat     | Sample<br>size<br>(figs) | Pollinator | <i>O.<br/>galili</i> | Figs with<br>other<br>NPFW |
|-------|-----------|---------------|-------------------|-------------|--------------------------|------------|----------------------|----------------------------|
| 1     | Jan 2013  | Kunming       | 1900              | Street tree | 31                       | -          | +                    | 3                          |
| 2     | Mar 2013  | Kunming       | 1902              | Street tree | 30                       | -          | +                    | 0                          |
| 3     | Mar 2013  | Kunming       | 1902              | Street tree | 39                       | -          | +                    | 1                          |
| 4     | Mar 2013  | Kunming       | 1902              | Street tree | 37                       | -          | +                    | 2                          |
| 5     | Jan 2013  | Kunming       | 1900              | Street tree | 30                       | +          | +                    | 20                         |
| 6     | Aug 2012  | Kunming       | 1902              | Street tree | 40                       | -          | +                    | 38                         |
| 7     | Mar 2013  | Kunming       | 1902              | Street tree | 30                       | -          | -                    | 14                         |
| 8     | Oct 2012  | Yanhe         | 1665              | Street tree | 30                       | +          | -                    | 29                         |
| 9     | Oct 2012  | Mengzi        | 1292              | Street tree | 22                       | +          | -                    | 18                         |
| 10    | Oct 2012  | Mengzi        | 1292              | Street tree | 23                       | +          | -                    | 16                         |
| 11    | Oct 2012  | Jianshui      | 1310              | Street tree | 22                       | +          | -                    | 2                          |
| 12    | Oct 2012  | Jianshui      | 1310              | Street tree | 21                       | +          | -                    | 1                          |
| 13    | Dec 2012  | Puer          | 1305              | Street tree | 30                       | +          | -                    | 1                          |
| 14    | Oct 2012  | Hekou         | 104               | Street tree | 25                       | -          | -                    | 25                         |
| 15    | Oct 2012  | Hekou         | 104               | Street tree | 22                       | -          | -                    | 22                         |
| 16    | Aug 2012  | Xishuangbanna | 553               | Street tree | 30                       | +          | +                    | 13                         |
| 17    | Sept 2012 | Xishuangbanna | 553               | Street tree | 30                       | +          | -                    | 15                         |
| 18    | Dec 2012  | Xishuangbanna | 553               | Street tree | 25                       | +          | -                    | 12                         |
| 19    | Dec 2012  | Xishuangbanna | 569               | Garden tree | 32                       | +          | +                    | 5                          |
| 20    | Nov 2012  | Xishuangbanna | 580               | Garden tree | 30                       | +          | +                    | 6                          |
